# Supplementary material
Source: publisher figshare collection journal article supplement (https://geolsoc.figshare.com/ndownloader/files/14465258)
Supplement: Supplementary file 1 [file 14465258]

## Sheet: data
rank1	data	mean	sd	se	t	UCL95		rank2	data							rank3	data
0.00125126	25							0.00137333	25							0.00146489	25
0.00466933	23							0.00497452	32							0.0355235	24
0.00878933	37							0.0141911	34							0.0439772	45
0.0089114	28							0.0184942	27							0.0461745	38
0.0149846	12							0.0217597	19							0.0528275	32
0.0237434	38							0.0316782	22.4							0.0617389	27
0.0350963	23.1							0.0497147	15							0.0732139	12
0.0562151	33							0.0504776	30							0.0768456	19.2
0.0570391	35							0.0628071	24							0.0908841	30
0.0635395	10							0.0739769	31							0.101352	33
0.0703757	35							0.0768151	35							0.10184	26
0.0914029	7							0.0787683	33							0.118473	19
0.0926237	28							0.0889004	33							0.119755	33
0.104678	54.6							0.0986053	45							0.124058	29
0.10828	31							0.0999481	28							0.125278	17
0.119083	24							0.109287	32							0.126408	23
0.12302	41.5							0.114414	36							0.139195	35
0.141575	36							0.136998	19							0.145085	30
0.142338	34							0.137455	23							0.147435	31
0.147313	20							0.156194	38							0.147832	28.2
0.147496	23							0.169591	0							0.16422	26.9
0.151555	34	28.7364	10.9346	2.33127	1.72074	32.7479		0.180303	23.1	27.4773	9.38174	2.00019	1.72074	30.9191		0.165075	0	26.5136	9.38359	2.00059	1.72074	29.9561
0.153233	45							0.181951	27							0.16895	12
0.155553	28							0.19895	29.4							0.17066	34
0.165899	21							0.203192	20							0.174688	27
0.166234	27							0.215674	25.2							0.176519	24
0.168981	20							0.216742	54.6							0.206214	26
0.174108	0							0.217566	34							0.208533	36
0.177892	21							0.218726	23							0.211676	29
0.191351	29							0.220099	45							0.214576	32
0.193304	16							0.229255	29							0.219092	25.2
0.205359	28							0.243416	37							0.219611	16
0.209601	30							0.244972	33							0.225959	31
0.225105	28							0.251747	41.5							0.228278	27
0.235328	31							0.25782	27							0.240852	35
0.266213	38							0.290323	33							0.243355	30
0.272897	19							0.305551	27							0.247383	26
0.275887	25							0.308084	17							0.259072	20
0.27958	28							0.313272	39.7							0.272683	33
0.297281	34							0.326487	34							0.276833	34
0.30195	29							0.326701	25							0.277444	26
0.303049	36							0.327067	47							0.283547	34
0.303995	28							0.329508	36							0.283639	16
0.345561	38	27.2273	9.18556	1.95837	1.72074	30.5971		0.336894	28	32.3818	9.13938	1.94852	1.72074	35.7347		0.297983	33	27.5545	6.69923	1.42828	1.72074	30.0123
0.350291	31							0.33787	38							0.299814	19
0.352123	19							0.351787	27							0.301065	36
0.361339	36							0.356822	37							0.32551	23.1
0.364452	12							0.358287	28.2							0.328776	54.6
0.367809	19.2							0.375591	34							0.33021	38
0.375866	35							0.37907	29							0.338878	36
0.37788	32							0.38612	27							0.342265	25
0.385235	21							0.386334	52							0.345927	22
0.392438	38							0.395276	36							0.349406	27
0.405591	35							0.39848	35							0.371349	0
0.425153	30							0.407544	33							0.372936	15
0.426222	25.2							0.429365	38							0.378094	32
0.426557	19							0.445265	31							0.380474	41.5
0.445692	14							0.450392	32							0.388012	35
0.450789	36							0.454573	28							0.389416	21
0.457961	26							0.459578	38							0.390576	14
0.462081	37							0.465529	19							0.392254	18
0.468459	32							0.477798	32							0.400403	22.4
0.475265	27							0.478713	22							0.415052	28
0.475295	25.3							0.493149	29							0.416517	20
0.479873	34							0.500626	18							0.42204	32
0.484939	12	27.0773	8.41155	1.79335	1.72074	30.1632		0.521226	31	31.5545	7.31624	1.55983	1.72074	34.2386		0.432325	32	26.8909	11.4062	2.43181	1.72074	31.0754
0.491897	29							0.525712	26							0.432814	23
0.503922	31							0.532609	35							0.437605	29
0.504807	35							0.534532	26							0.453902	34
0.513535	27							0.543077	26							0.464583	25.3
0.517014	25.2							0.544115	12							0.466292	38
0.517106	33							0.54503	20							0.469741	28
0.519883	52							0.5515	37							0.471145	25
0.531663	27							0.557482	23							0.476577	29.4
0.539354	36							0.558123	20							0.48085	23
0.563585	16							0.558977	0							0.483627	32
0.568743	28.2							0.567156	28							0.489059	12
0.571184	31							0.567278	32							0.504501	19
0.572405	23							0.577319	24							0.517441	36
0.582049	36							0.577441	29							0.523453	27
0.585009	32							0.581072	30							0.526841	32
0.587909	32							0.587176	27							0.540239	31
0.599048	31							0.594928	36							0.546495	29.9
0.601764	29							0.598132	35							0.561541	28
0.607166	29							0.599689	34							0.56679	29
0.607685	32							0.607807	25							0.576769	31
0.608966	18							0.609119	32							0.587176	30
0.611499	22	29.7455	7.25014	1.54573	1.72074	32.4053		0.618061	35	26.9091	8.646	1.84333	1.72074	30.081		0.596606	28	28.1636	5.62846	1.19999	1.72074	30.2285
0.657308	33							0.618366	23							0.601764	21
0.662984	22.4							0.618824	35							0.614582	26.1
0.663045	17							0.626362	28							0.637623	45
0.677206	35							0.634205	29.9							0.640889	37
0.682241	26.9							0.656514	34							0.652364	33
0.683187	21							0.659627	52							0.658528	28
0.691183	28							0.667135	31							0.659474	21
0.692892	17							0.671316	21							0.664174	47
0.699759	20							0.674306	21							0.685263	28
0.710501	27							0.689261	31							0.685415	27
0.721915	29.9							0.6957	19							0.689535	36
0.726493	15							0.701987	35							0.702536	23
0.726676	37							0.715354	32							0.704855	37
0.732017	23							0.722343	19.2							0.717277	27
0.735008	32							0.738487	16							0.719535	34
0.743736	19							0.753868	28							0.726585	35
0.744438	25							0.758019	30							0.728263	7
0.746605	0							0.781945	26.1							0.731315	35
0.751549	34							0.783685	21							0.736259	31
0.755852	23							0.789941	31							0.759453	10
0.779656	34							0.806635	27							0.760155	37
0.783319	21	24.5545	8.49654	1.81147	1.72074	27.6716		0.809107	25	27.9636	7.71094	1.64398	1.72074	30.7925		0.777795	35	30.0045	9.70814	2.06978	1.72074	33.5661
0.802606	45							0.812677	28							0.777795	33
0.802881	33							0.820978	36							0.779473	31
0.808741	26							0.822657	25.2							0.791925	39.7
0.817194	21							0.825709	31							0.799371	52
0.82168	26							0.82696	12							0.807123	31
0.82284	25							0.832087	26							0.825373	30
0.834681	39.7							0.839351	21							0.828547	36
0.837611	33							0.846065	21							0.830622	25
0.840144	32							0.850673	30							0.83227	27
0.843654	31							0.860286	0							0.851375	29
0.858943	0							0.875942	36							0.852931	29
0.862239	29							0.883847	21							0.861538	21
0.875973	30							0.888546	33							0.861629	0
0.877255	52							0.891629	16							0.873318	34
0.895962	27							0.898404	30							0.895444	38
0.905118	33							0.899808	32							0.895474	52
0.91879	30							0.900998	28							0.900235	28
0.921384	29.4							0.906735	29							0.908811	21
0.925718	27							0.909116	17							0.909207	28
0.949156	24							0.909848	7							0.914396	25.2
0.949339	26.1							0.911527	10							0.920347	28
0.949583	26	29.3273	9.63551	2.0543	1.72074	32.8622		0.918149	14	22.8727	9.84035	2.09797	1.72074	26.4828		0.921079	20	29.9045	10.7392	2.2896	1.72074	33.8444
0.955901	30							0.923246	26.9							0.921903	19
0.966613	32							0.926756	12							0.953154	17
0.988525	28							0.929228	23							0.963347	21
0.98999	47							0.964782	29							0.967437	23
0.996796	35							0.96997	25.3							0.989013	32
0.999695	27							0.981262	28							0.998383	35
count	138
